# Supplementary material
Source: PubMed Central journal article supplement (PMC4654044)
Supplement: austprescr-38-006-s1.pdf [file austprescr-38-006-s1.pdf]

## Choosing a combined oral contraceptive pill

Mary Stewart, Kirsten Black

*Aust Prescr 2015;38:6-11*

This activity was developed by Australian Prescriber based on the content of the article, which can be read in full at [www.australianprescriber.com/magazine/38/1/6/11](http://www.australianprescriber.com/magazine/38/1/6/11)

### SUMMARY

The combined oral contraceptive pill is an effective contraceptive method which can also offer other benefits. However, other contraceptive options should be discussed. If the pill is the chosen method, prescribe a pill with the lowest effective dose of oestrogen and progestogen.

Pills containing levonorgestrel or norethisterone in combination with ethinylloestradiol 35 microgram or less are considered first-line. They are effective if taken correctly, have a relatively low risk of venous thromboembolism, and are listed on the Pharmaceutical Benefits Scheme.

The pill is usually taken in a monthly cycle. Some women may prefer an extended pill regimen with fewer or no inactive pills.

### Learning Objectives

1. Know the hormones contained in combined oral contraceptive pills
2. Identify harmful effects associated with the combined oral contraceptive pill

### Pharmacist Competency Standards

- 4.2 Consider the appropriateness of prescribed medicines
- 7.2 Provide ongoing medication management

*These standards are in National Competency Standards Framework for Pharmacists in Australia 2010.*

### Questions

Visit <http://sgjz.mobi/s3/Choosing-a-combined-oral-contraceptive-pill> to complete this activity

1. In a combined oral contraceptive pill, which of the following hormones has a lower risk of venous thromboembolism?

- a) desogestrel
- b) drospirenone
- c) gestodene
- d) levonorgestrel

2. Which of the following symptoms is unlikely to respond to reducing the dose of oestrogen in a combined oral contraceptive pill?

- a) bloating and fluid retention

This CPD activity should take around one hour to complete. It can be included in a pharmacist's CPD plan for two Group 2 non-accredited CPD credits. Pharmacists should self-record this activity.

To complete this Group 2 activity, you should read the article and complete the online quiz. The questions are based on the content of the article.

The correct responses will be forwarded to the email address you provide, with proof of your participation, when you electronically submit answers to the questions. There will also be space to reflect on your responses and what you have learned through this activity.

(Note that Australian Prescriber CPD activities are not accredited by the Australian Pharmacy Council.)

- b) breakthrough bleeding
- c) breast tenderness
- d) headache
- e) nausea

**3. Which of the following hormones used in the combined oral contraceptive pill is an oestrogen?**

- a) cyproterone
- b) desogestrel
- c) gestodene
- d) mestranol
- e) nomegestrol

**4. True or false?**

- a) A pill containing a combination of ethinylloestradiol and drospirenone may reduce premenstrual symptoms
- b) It is unsafe to take a monophasic combined oral contraceptive pill continuously for three months
- c) Triphasic oral contraceptive pills have significant advantages over monophasic regimens
- d) Quadraphasic contraceptive pills are recommended for women with heavy menstrual bleeding
- e) The combined oral contraceptive pill is not recommended for use by women who are breastfeeding
- f) Only combined oral contraceptive pills containing cyproterone acetate improve acne
- g) The combined oral contraceptive pill is contraindicated in women who have migraine with aura

**Answers will be provided via email on completion of the activity at the link above.**

---

Published by

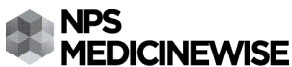

For a medicinewise Australia.

Independent. Not-for-profit. Evidence based.

Funded by the Australian Government Department of Health

© National Prescribing Service Limited.  
ABN 61 082 034 393.

**NPS Disclaimer**

The information provided in this activity is intended for health professionals but is not medical advice. If you are a health professional, do not use it solely to treat or diagnose another person's medical condition. If you are not a health professional, do not use the information to treat or diagnose your own medical condition and never ignore medical advice or delay seeking it because of something herein. You must rely on your own professional skill, care and inquiries in clinical decision-making in the giving of advice to patients and/or providing treatment. Information contained in this activity must be interpreted by you having regard to the particular clinical circumstances of your patients. Medicines information about medicines changes and may not be accurate when you access it. To the fullest extent permitted by law, National Prescribing Service Ltd (NPS MedicineWise) disclaims all liability (including without limitation for negligence) for any loss, damage, or injury resulting from reliance on, or use of this activity or the information contained in it. Any references to brands should not be taken as an endorsement by NPS MedicineWise. Read our full disclaimer at [www.nps.org.au/about-this-website/terms-of-use](http://www.nps.org.au/about-this-website/terms-of-use)
